# Supplementary material
Source: PubMed Central journal article supplement (PMC4160738)
Supplement: NIHMS625937-supplement-01.pdf [file NIHMS625937-supplement-01.pdf]

**Supplemental Material: Table 1**

**Supplemental Table 1.** Tabular results of one-way ANOVAs of Genotype for Western blots for NMDA receptor subunits in multiple brain regions. N = 4-7 mice/genotype; DLS, dorsolateral striatum; NAc, nucleus accumbens; dmPFC, dorsomedial prefrontal cortex; BNST, bed nucleus of the stria terminalis; RF, reticular formation.

| <b>NMDA RECEPTOR SUBUNIT</b> |                             |                            |                          |
|------------------------------|-----------------------------|----------------------------|--------------------------|
| <b>BRAIN REGION</b>          | <b>NR2B</b>                 | <b>NR1</b>                 | <b>NR2A</b>              |
| <b>DLS</b>                   | F(3,12) = 13.33, P < 0.001  | F(3,12) = 14.92, P < 0.001 | F(3,12) = 0.32, P = 0.81 |
| <b>NAc</b>                   | F(3,12) = 29.35, P < 0.0001 | F(3,12) = 22.10, P < 0.001 | F(3,19) = 0.49, P = 0.69 |
| <b>Hippocampus</b>           | F(3,12) = 10.96, P < 0.001  | F(3,12) = 4.42, P < 0.05   | F(3,12) = 0.27, P = 0.84 |
| <b>dmPFC</b>                 | F(3,12) = 70.17, P < 0.0001 | F(3,12) = 7.875, P < 0.01  | F(3,24) = 0.87, P = 0.47 |
| <b>Amygdala</b>              | F(3,16) = 5.88, P < 0.01    | F(3,24) = 5.038, P < 0.01  | F(3,28) = 0.05, P = 0.98 |
| <b>BNST</b>                  | F(3,20) = 6.63, P < 0.01    | F(3,15) = 9.07, P < 0.01   | F(3,12) = 0.77, P = 0.37 |
| <b>RF</b>                    | F(3,16) = 0.28, P = 0.84    | F(3,16) = 0.25, P = 0.86   | F(3,12) = 0.22, P = 0.88 |
| <b>Medulla</b>               | F(3,15) = 0.19, P = 0.90    | F(3,12) = 0.48, P = 0.70   | F(3,16) = 0.28, P = 0.86 |
